# Supplementary material
Source: MDPI journal article supplement (https://www.mdpi.com/2076-0760/7/3/44)
Supplement: s1 [file s1]

## Sheet: Sup. Material (2)
Latent Construct Identifiers	Survey item location	n	mean	sd	Q3a	Q3b	Q3c	Q3d	Q3e	Q3f	Q3g	Q4a	Q4b	Q4c	Q4d	Q4e	Q4f	Q4g	Q5a	Q5b	Q5c	Q5d	Q5e	Q5f	Q5g	Q5h	Q6a	Q6b	Q6c	Q6d	Q6e	Q6f	Q6g	Q6h	Q6i	Q7Phys_b	Q7Phys_c	Q7Phys_d	Q7Phys_e	Q7Phys_f	Q7Phys_g	Q7Phys_h	Q7Phys_i	Q7Phys_j	Q7Phys_k	Q7Phys_l	Q7Phys_m	Q7Phys_n	Q7Math_b
Instrumentality	Q3a	397	5.49622	0.691296
Perceptions of Future	Q3b	397	4.40806	1.42479	0.36***
Perceptions of Future	Q3c	397	4.79597	1.27572	0.30***	0.59***
Perceptions of Future	Q3d	397	4.74055	1.15719	0.33***	0.64***	0.75***
Perceptions of Future	Q3e	397	5.11083	1.09074	0.32***	0.53***	0.77***	0.71***
Instrumentality	Q3f	397	5.54156	0.682694	0.61***	0.34***	0.41***	0.38***	0.46***
Instrumentality	Q3g	397	5.47607	0.814984	0.47***	0.32***	0.41***	0.39***	0.41***	0.60***
Career Outcome Expectation	Q4a	397	4.51385	1.10688	0.03	0.06	0.03	-0.03	-0.02	0.02	0.01
Career Outcome Expectation	Q4b	397	2.80856	1.55979	0	0.18***	0.14**	0.08	0.06	0.04	0.01	0.41***
Career Outcome Expectation	Q4c	397	5.34509	0.909716	0.19***	0.12*	0.15**	0.17***	0.12*	0.26***	0.22***	0.03	0.17***
Career Outcome Expectation	Q4d	397	3.45088	1.34304	0.05	0.15**	0.13**	0.13*	0.08	0.09	0.04	0.21***	0.44***	0.23***
Career Outcome Expectation	Q4e	397	4.64484	1.28405	0.18***	0.19***	0.20***	0.18***	0.17***	0.23***	0.22***	0.07	0.22***	0.43***	0.37***
Career Outcome Expectation	Q4f	397	4.85139	1.17876	0.24***	0.41***	0.40***	0.40***	0.41***	0.25***	0.22***	0.1	0.24***	0.18***	0.20***	0.33***
Career Outcome Expectation	Q4g	397	5.43577	0.761465	0.25***	0.26***	0.25***	0.29***	0.23***	0.21***	0.21***	-0.01	0.12*	0.28***	0.13**	0.27***	0.50***
Grit: Persistence of Effort	Q5a	397	4.78086	1.20178	0.15**	0.17***	0.13*	0.16**	0.11*	0.19***	0.13**	0.10*	0.11*	0.16**	0.14**	0.12*	0.09	0.19***
Grit: Consistency of Interest	Q5b	397	2.73048	1.52766	-0.17***	-0.34***	-0.23***	-0.22***	-0.25***	-0.15**	-0.19***	0.12*	0.05	-0.04	0.02	-0.10*	-0.13**	-0.13**	0.05
Grit: Consistency of Interest	Q5c	397	2.52645	1.43809	-0.18***	-0.18***	-0.18***	-0.12*	-0.16**	-0.17***	-0.16***	0.12*	0.09	-0.12*	-0.05	-0.18***	-0.08	-0.1	-0.02	0.47***
Grit: Persistence of Effort	Q5d	397	5.20907	0.955642	0.23***	0.15**	0.16**	0.16**	0.19***	0.21***	0.22***	0.06	0.04	0.29***	0.12*	0.22***	0.09	0.21***	0.36***	-0.06	-0.12*
Grit: Consistency of Interest	Q5e	397	2.2796	1.44946	-0.18***	-0.29***	-0.23***	-0.20***	-0.24***	-0.21***	-0.19***	0.10*	0.15**	-0.02	0	-0.06	-0.08	-0.06	-0.05	0.55***	0.65***	-0.08
Grit: Consistency of Interest	Q5f	397	2.19395	1.40532	-0.19***	-0.31***	-0.23***	-0.25***	-0.28***	-0.21***	-0.25***	0.05	0.04	-0.15**	-0.06	-0.14**	-0.17***	-0.14**	-0.19***	0.38***	0.45***	-0.26***	0.52***
Grit: Persistence of Effort	Q5g	397	4.46348	1.24389	0.19***	0.22***	0.19***	0.20***	0.21***	0.18***	0.17***	0.09	0.07	0.16**	0.15**	0.19***	0.20***	0.15**	0.18***	-0.19***	-0.33***	0.30***	-0.30***	-0.36***
Grit: Persistence of Effort	Q5h	397	4.89169	1.08983	0.24***	0.19***	0.12*	0.16**	0.15**	0.21***	0.19***	0.07	0.04	0.23***	0.1	0.13**	0.13*	0.23***	0.30***	-0.14**	-0.26***	0.56***	-0.22***	-0.36***	0.52***
Career Choice	Q6a	397	2.42317	1.84562	0.03	0.02	0	0.01	0.05	0.03	0	0	0.15**	0.04	0.11*	0.11*	0.08	0.16**	0.06	0.05	0.04	0.05	0.03	0.04	0.02	0.04
Career Choice	Q6b	397	5.13098	0.939037	0.30***	0.36***	0.51***	0.41***	0.50***	0.35***	0.31***	0.13**	0.06	0.10*	0.08	0.13**	0.38***	0.15**	0.10*	-0.17***	-0.09	0.19***	-0.15**	-0.19***	0.18***	0.12*	-0.01
Career Choice	Q6c	397	2.97733	1.70619	0.09	0.11*	0.14**	0.12*	0.14**	0.09	0.11*	0.13**	0.15**	0.02	0.20***	0.14**	0.25***	0.1	0.15**	0.13**	0.07	0.09	0.04	-0.02	0.04	0.13**	0.10*	0.18***
Career Choice	Q6d	397	1.35264	1.49463	-0.06	-0.07	-0.03	-0.03	-0.04	-0.05	-0.01	0.04	0.05	0.03	0.13*	-0.02	-0.05	-0.06	0.01	0.06	0.05	-0.08	0.06	0.07	-0.07	-0.09	0.08	-0.09	0.14**
Career Choice	Q6e	397	1.02015	1.42297	-0.03	-0.09	-0.12*	-0.15**	-0.08	-0.05	-0.05	-0.14**	-0.14**	0.06	0.05	0.12*	-0.14**	-0.03	-0.08	0.07	-0.06	0	0.01	0.06	0.01	-0.02	0.30***	-0.06	-0.05	0.08
Career Choice	Q6f	397	1.11083	1.50179	-0.05	-0.09	-0.11*	-0.13**	-0.1	-0.09	-0.06	0.09	0.10*	0.04	0.15**	0.07	-0.07	-0.10*	-0.03	0.05	-0.06	-0.06	-0.03	-0.01	0.03	-0.03	0.12*	-0.12*	0.17***	0.37***	0.16**
Career Choice	Q6g	397	2.96725	2.18268	0.02	0.07	-0.04	0.04	-0.06	-0.01	0	0.06	0.16**	0.20***	0.05	0.15**	0.02	0.07	0.06	0.02	-0.02	0.03	0.05	0.01	0.11*	0.07	0.08	-0.16**	0.03	0.06	0.1	0.17***
Career Choice	Q6h	397	2.42821	1.84172	0.04	-0.04	-0.02	0.01	0	0.07	0.05	-0.15**	-0.09	0.24***	-0.09	0.12*	0.06	0.09	0.02	0.07	0.04	0.04	0.04	0.08	0	0.03	0.15**	-0.05	0.21***	0.14**	0.15**	0.10*	0.14**
Career Choice	Q6i	397	2.00252	1.79716	-0.08	-0.16**	-0.20***	-0.17***	-0.14**	-0.08	-0.11*	-0.04	0.04	-0.03	-0.05	-0.08	-0.05	-0.05	-0.01	0.19***	0.18***	-0.03	0.18***	0.17***	-0.14**	-0.07	0.13**	-0.14**	0.19***	0.07	0.09	0.07	-0.03	0.35***
Recognition	Q7Phys_b	397	3.54156	1.62101	0.08	0.11*	0.13*	0.14**	0.12*	0.04	-0.04	0	0.07	0	0.08	0.12*	0.11*	-0.02	0.06	-0.10*	-0.08	0.01	-0.06	-0.05	0.11*	0.05	0.11*	0.11*	0.09	0.01	-0.01	-0.01	0	0.03	0.06
Recognition	Q7Phys_c	397	3.4937	1.34393	0.11*	0.15**	0.15**	0.15**	0.13**	0.11*	0.05	0.08	0.15**	0.04	0.03	0.16**	0.11*	0.02	0.14**	-0.08	-0.10*	0.12*	-0.06	-0.08	0.15**	0.08	0.13*	0.14**	0.09	0.01	-0.04	0.01	0.03	-0.01	0	0.68***
Recognition	Q7Phys_d	397	3.71033	1.56967	0.15**	0.17***	0.18***	0.18***	0.15**	0.13*	0.04	0.02	0.11*	0.06	0.06	0.11*	0.16**	0.08	0.13*	-0.12*	-0.1	0.02	-0.08	-0.1	0.19***	0.04	0.11*	0.15**	0.13*	0.02	-0.04	-0.03	0.05	0.05	0.04	0.74***	0.73***
Recognition	Q7Phys_e	397	3.47607	1.84022	0.09	0.10*	0.17***	0.10*	0.14**	0.08	0	0.03	0.12*	0.03	0.15**	0.12*	0.15**	0.04	0.09	-0.08	-0.12*	0.12*	-0.04	-0.10*	0.15**	0.10*	0.06	0.12*	0.14**	0.01	-0.10*	-0.02	-0.02	0	0.02	0.65***	0.61***	0.69***
Interest	Q7Phys_f	397	4.70781	1.43381	0.15**	0.15**	0.26***	0.24***	0.24***	0.19***	0.06	-0.03	-0.02	0.06	0.07	0.07	0.13*	0.13*	0.03	-0.08	-0.06	0.07	-0.02	-0.09	0.07	0.03	0.06	0.18***	0.05	0.05	0.01	-0.07	-0.06	0.03	0.02	0.47***	0.40***	0.50***	0.49***
Interest	Q7Phys_g	397	4.28967	1.5952	0.16**	0.20***	0.29***	0.27***	0.28***	0.16**	0.06	-0.03	0.06	0.06	0.08	0.15**	0.16**	0.13**	0.07	-0.09	-0.08	0.06	-0.03	-0.09	0.08	-0.01	0.12*	0.20***	0.04	-0.01	-0.03	-0.11*	-0.09	-0.01	0	0.58***	0.50***	0.57***	0.57***	0.76***
Interest	Q7Phys_h	397	4.00252	1.56105	0.15**	0.19***	0.26***	0.24***	0.23***	0.19***	0.09	-0.02	0.12*	0.07	0.11*	0.13*	0.15**	0.09	0.06	-0.11*	-0.13**	0.07	-0.04	-0.11*	0.15**	0.05	0.09	0.22***	0.01	-0.01	-0.07	-0.08	-0.07	0	-0.02	0.55***	0.53***	0.56***	0.60***	0.64***	0.81***
P/C	Q7Phys_i	397	3.93955	1.36751	0.21***	0.25***	0.28***	0.28***	0.24***	0.19***	0.1	-0.02	0.04	0.08	0.05	0.11*	0.19***	0.12*	0.11*	-0.18***	-0.14**	0.15**	-0.09	-0.12*	0.15**	0.06	0.07	0.18***	0	-0.05	-0.04	-0.1	0	0	-0.08	0.48***	0.50***	0.55***	0.51***	0.47***	0.58***	0.57***
P/C	Q7Phys_j	397	3.77834	1.4534	0.17***	0.21***	0.23***	0.24***	0.19***	0.20***	0.09	-0.03	0.07	0.08	0.06	0.16**	0.16***	0.08	0.13*	-0.14**	-0.15**	0.14**	-0.09	-0.16**	0.17***	0.03	0.05	0.16**	0.01	-0.03	-0.08	-0.09	-0.01	-0.05	-0.08	0.49***	0.50***	0.53***	0.53***	0.49***	0.59***	0.59***	0.86***
P/C	Q7Phys_k	397	3.84383	1.34682	0.21***	0.29***	0.26***	0.29***	0.22***	0.18***	0.11*	-0.01	0.08	0.13**	0.11*	0.17***	0.13**	0.06	0.15**	-0.16**	-0.15**	0.20***	-0.11*	-0.19***	0.17***	0.14**	0.03	0.18***	0.01	-0.05	-0.06	-0.13*	0.02	-0.05	-0.06	0.52***	0.53***	0.52***	0.55***	0.44***	0.55***	0.55***	0.77***	0.77***
P/C	Q7Phys_l	397	4.1738	1.39172	0.20***	0.23***	0.25***	0.28***	0.22***	0.18***	0.10*	-0.01	0.07	0.06	0.03	0.06	0.15**	0.08	0.06	-0.14**	-0.14**	0.14**	-0.13*	-0.15**	0.17***	0.08	0.01	0.17***	-0.03	-0.03	-0.09	-0.14**	0.05	-0.05	-0.07	0.49***	0.51***	0.54***	0.55***	0.44***	0.59***	0.59***	0.75***	0.74***	0.79***
Recognition	Q7Phys_m	397	3.52897	1.73563	0.13*	0.15**	0.17***	0.21***	0.10*	0.11*	0.07	0.07	0.17***	0.07	0.08	0.13**	0.07	0.02	0.16**	-0.11*	-0.09	0.08	-0.02	-0.12*	0.16**	0.10*	0.03	0.08	0.06	-0.04	-0.14**	-0.03	0.03	-0.03	-0.05	0.57***	0.61***	0.61***	0.65***	0.33***	0.48***	0.54***	0.58***	0.61***	0.65***	0.64***
P/C	Q7Phys_n	397	4.28715	1.30777	0.21***	0.14**	0.19***	0.25***	0.17***	0.22***	0.10*	0.01	0.06	0.08	0.05	0.10*	0.15**	0.21***	0.26***	-0.06	-0.09	0.19***	-0.14**	-0.11*	0.18***	0.17***	0.11*	0.14**	0.09	0	-0.12*	-0.07	0.07	0.04	-0.07	0.44***	0.47***	0.49***	0.50***	0.37***	0.46***	0.49***	0.49***	0.52***	0.53***	0.56***	0.54***
Recognition	Q7Math_b	397	5.05038	1.14701	0.02	0.09	0.08	0.1	0.04	0.04	0.05	0.03	0.03	0.1	0.06	0.18***	0.01	0.03	0.03	-0.09	-0.09	0.11*	-0.05	-0.06	0.06	0.16**	0.09	0.05	-0.08	-0.05	0.09	-0.01	-0.01	0	-0.03	0.30***	0.25***	0.23***	0.10*	0.07	0.09	0.11*	0.11*	0.08	0.14**	0.1	0.16**	0.17***
Recognition	Q7Math_c	397	4.49874	1.18625	0.04	0.10*	0.08	0.08	0.06	0.11*	0.04	0.14**	0.08	0	0.03	0.18***	0.03	0.07	0.08	-0.08	-0.09	0.14**	-0.05	-0.09	0.15**	0.19***	0.12*	0.08	0	-0.03	0.06	0	0.01	-0.01	-0.03	0.23***	0.39***	0.21***	0.14**	0.07	0.06	0.10*	0.15**	0.14**	0.19***	0.12*	0.21***	0.18***	0.54***
Recognition	Q7Math_d	397	4.82368	1.176	0.13*	0.11*	0.15**	0.16**	0.11*	0.17***	0.14**	0.06	0	0.08	0.01	0.12*	0.08	0.09	0.09	-0.09	-0.10*	0.15**	-0.07	-0.14**	0.18***	0.23***	0.04	0.13*	0.04	-0.05	0.07	-0.07	0.07	0.1	0.01	0.26***	0.25***	0.38***	0.17***	0.16**	0.09	0.11*	0.20***	0.15**	0.22***	0.20***	0.21***	0.19***	0.59***
Recognition	Q7Math_e	397	4.97733	1.19637	0.12*	0.06	0.20***	0.16**	0.19***	0.19***	0.16**	0.02	0.01	0.05	0.05	0.13**	0.14**	0.09	0.12*	-0.06	-0.06	0.23***	-0.05	-0.15**	0.13**	0.21***	0.06	0.15**	0.07	-0.01	0.07	-0.05	0.02	0.06	0	0.20***	0.23***	0.25***	0.24***	0.19***	0.16**	0.15**	0.22***	0.20***	0.19***	0.17***	0.16**	0.19***	0.55***
Interest	Q7Math_f	397	5.17632	1.0656	0.13**	0.18***	0.27***	0.25***	0.26***	0.22***	0.22***	0.02	0.03	0.06	0.03	0.21***	0.19***	0.19***	0.16**	-0.09	-0.10*	0.18***	-0.03	-0.17***	0.08	0.12*	0.11*	0.19***	0.07	0	0.08	-0.06	0.01	0.02	0	0.13**	0.16**	0.18***	0.08	0.30***	0.23***	0.22***	0.12*	0.12*	0.1	0.08	0.06	0.13**	0.42***
Interest	Q7Math_g	397	5.07305	1.14248	0.15**	0.15**	0.25***	0.26***	0.27***	0.23***	0.22***	-0.04	0	0.08	0.02	0.16**	0.15**	0.16**	0.12*	-0.11*	-0.09	0.15**	-0.02	-0.12*	0.10*	0.09	0.16**	0.16**	0.06	0.02	0.12*	-0.08	0.03	0.03	0	0.11*	0.13**	0.17***	0.06	0.17***	0.18***	0.20***	0.14**	0.13**	0.14**	0.14**	0.10*	0.19***	0.52***
Interest	Q7Math_h	397	4.9068	1.17803	0.15**	0.16**	0.28***	0.25***	0.28***	0.26***	0.27***	-0.02	0.04	0.04	0.05	0.11*	0.19***	0.19***	0.1	-0.07	-0.07	0.14**	-0.03	-0.13**	0.14**	0.10*	0.13*	0.20***	0.08	-0.01	0.1	-0.08	-0.04	0.04	0.03	0.10*	0.17***	0.18***	0.1	0.19***	0.23***	0.32***	0.19***	0.19***	0.18***	0.19***	0.14**	0.24***	0.47***
P/C	Q7Math_i	397	4.81612	1.02195	0.17***	0.18***	0.20***	0.20***	0.22***	0.18***	0.15**	0.05	0.02	0.04	-0.04	0.09	0.17***	0.16***	0.10*	-0.09	-0.09	0.15**	-0.04	-0.15**	0.12*	0.12*	0.15**	0.16***	0.02	-0.07	0.12*	-0.1	0.01	0.03	-0.02	0.09	0.21***	0.15**	0.06	0.10*	0.09	0.12*	0.38***	0.33***	0.27***	0.23***	0.20***	0.19***	0.42***
P/C	Q7Math_j	397	4.67254	1.07006	0.12*	0.20***	0.24***	0.23***	0.23***	0.19***	0.15**	0.06	0.04	-0.02	-0.07	0.1	0.19***	0.16**	0.12*	-0.11*	-0.12*	0.09	-0.06	-0.16**	0.15**	0.04	0.11*	0.15**	0	-0.01	0.06	-0.05	0	0	-0.03	0.09	0.18***	0.13**	0.07	0.09	0.12*	0.13*	0.32***	0.37***	0.26***	0.22***	0.18***	0.17***	0.40***
P/C	Q7Math_k	397	4.69773	1.03686	0.18***	0.20***	0.23***	0.25***	0.24***	0.20***	0.16**	0.08	0.08	0.06	0.04	0.14**	0.21***	0.17***	0.12*	-0.06	-0.11*	0.16**	-0.04	-0.13**	0.22***	0.15**	0.13**	0.22***	0.01	-0.05	0.02	-0.09	-0.01	0	-0.02	0.16**	0.23***	0.16**	0.11*	0.11*	0.10*	0.14**	0.27***	0.26***	0.39***	0.28***	0.20***	0.24***	0.41***
P/C	Q7Math_l	397	4.96725	0.924654	0.18***	0.17***	0.22***	0.22***	0.23***	0.23***	0.21***	0.05	0.03	0.06	-0.07	0.13**	0.20***	0.23***	0.08	-0.11*	-0.08	0.20***	-0.09	-0.20***	0.18***	0.16**	0.11*	0.21***	0	-0.08	0.05	-0.14**	-0.03	0.03	-0.02	0.12*	0.21***	0.17***	0.13*	0.18***	0.17***	0.19***	0.31***	0.31***	0.34***	0.36***	0.26***	0.28***	0.42***
Recognition	Q7Math_m	397	4.85642	1.2338	0.15**	0.14**	0.21***	0.24***	0.17***	0.19***	0.23***	0.02	-0.01	0.07	0.02	0.14**	0.15**	0.19***	0.10*	-0.11*	-0.13**	0.13**	-0.08	-0.19***	0.21***	0.20***	0.12*	0.13**	0.01	-0.06	0.1	-0.04	0.05	0.05	-0.01	0.12*	0.21***	0.19***	0.11*	0.12*	0.07	0.11*	0.20***	0.19***	0.23***	0.18***	0.31***	0.27***	0.49***
P/C	Q7Math_n	397	4.90932	1.05975	0.18***	0.18***	0.26***	0.28***	0.23***	0.26***	0.19***	0.05	0.07	0.11*	0.03	0.11*	0.17***	0.24***	0.24***	-0.13**	-0.07	0.19***	-0.10*	-0.14**	0.20***	0.18***	0.15**	0.20***	0.05	0	-0.04	-0.07	0.01	0.03	-0.03	0.14**	0.17***	0.19***	0.13*	0.13**	0.15**	0.18***	0.23***	0.24***	0.22***	0.24***	0.22***	0.48***	0.37***
Recognition	Q8Eng_d	397	4.86146	1.25869	0.21***	0.29***	0.38***	0.33***	0.35***	0.29***	0.22***	0.05	0.17***	0.18***	0.27***	0.25***	0.25***	0.18***	0.11*	-0.18***	-0.14**	0.23***	-0.14**	-0.13**	0.26***	0.15**	0.02	0.35***	0.08	-0.05	-0.02	-0.01	-0.04	-0.03	-0.13**	0.28***	0.23***	0.26***	0.18***	0.17***	0.17***	0.19***	0.18***	0.17***	0.20***	0.21***	0.17***	0.21***	0.27***
Recognition	Q8Eng_e	397	4.25945	1.22915	0.22***	0.39***	0.40***	0.37***	0.33***	0.30***	0.24***	0.07	0.15**	0.19***	0.20***	0.25***	0.30***	0.18***	0.15**	-0.12*	-0.09	0.24***	-0.15**	-0.15**	0.26***	0.21***	0.05	0.33***	0.11*	-0.02	0	-0.02	0.01	-0.07	-0.12*	0.14**	0.21***	0.15**	0.09	0.12*	0.14**	0.16**	0.22***	0.19***	0.24***	0.22***	0.16**	0.23***	0.13*
Recognition	Q8Eng_f	397	4.51385	1.25446	0.25***	0.40***	0.46***	0.40***	0.41***	0.34***	0.29***	0.04	0.16**	0.19***	0.16**	0.23***	0.29***	0.17***	0.13*	-0.21***	-0.13**	0.15**	-0.20***	-0.23***	0.22***	0.18***	0.02	0.38***	0.09	-0.05	-0.02	-0.12*	-0.02	-0.06	-0.14**	0.23***	0.21***	0.27***	0.13*	0.16**	0.19***	0.20***	0.25***	0.22***	0.28***	0.25***	0.21***	0.23***	0.21***
Recognition	Q8Eng_g	397	3.58438	1.81772	0.16**	0.28***	0.32***	0.31***	0.31***	0.21***	0.13**	-0.01	0.19***	0.15**	0.24***	0.16**	0.26***	0.12*	0.18***	-0.10*	-0.03	0.11*	-0.07	-0.12*	0.12*	0.07	0.07	0.19***	0.14**	0.01	0.01	0.02	0	0.04	0.02	0.21***	0.14**	0.21***	0.24***	0.15**	0.19***	0.17***	0.23***	0.19***	0.25***	0.19***	0.21***	0.25***	0.11*
Interest	Q8Eng_h	397	5.4937	0.754171	0.36***	0.41***	0.52***	0.48***	0.50***	0.44***	0.37***	0	0.1	0.18***	0.14**	0.23***	0.36***	0.30***	0.17***	-0.25***	-0.13**	0.19***	-0.22***	-0.21***	0.16**	0.16**	0.01	0.37***	0.14**	-0.11*	-0.04	-0.12*	-0.06	0.03	-0.06	0.15**	0.16**	0.19***	0.14**	0.29***	0.31***	0.25***	0.28***	0.27***	0.26***	0.28***	0.14**	0.22***	0.09
Interest	Q8Eng_i	397	5.20907	0.952995	0.36***	0.53***	0.59***	0.57***	0.56***	0.38***	0.35***	-0.04	0.14**	0.22***	0.09	0.22***	0.42***	0.36***	0.24***	-0.23***	-0.16**	0.22***	-0.24***	-0.27***	0.18***	0.20***	0.08	0.44***	0.12*	-0.10*	-0.04	-0.14**	-0.03	-0.01	-0.1	0.21***	0.19***	0.24***	0.18***	0.33***	0.36***	0.33***	0.35***	0.35***	0.34***	0.33***	0.21***	0.31***	0.14**
Interest	Q8Eng_j	397	5.06297	1.01432	0.35***	0.52***	0.58***	0.57***	0.55***	0.38***	0.34***	-0.06	0.11*	0.23***	0.07	0.21***	0.38***	0.34***	0.23***	-0.24***	-0.14**	0.22***	-0.21***	-0.26***	0.21***	0.21***	0.08	0.44***	0.09	-0.07	-0.05	-0.15**	-0.03	-0.01	-0.13**	0.19***	0.20***	0.22***	0.15**	0.30***	0.31***	0.34***	0.33***	0.33***	0.37***	0.33***	0.21***	0.28***	0.14**
P/C	Q8Eng_k	397	4.7204	1.11006	0.32***	0.54***	0.46***	0.47***	0.46***	0.31***	0.28***	0.01	0.15**	0.19***	0.07	0.18***	0.38***	0.27***	0.22***	-0.17***	-0.12*	0.32***	-0.19***	-0.30***	0.26***	0.29***	0.08	0.41***	0.08	-0.09	-0.04	-0.10*	0.01	-0.01	-0.13**	0.13**	0.22***	0.21***	0.12*	0.18***	0.20***	0.25***	0.43***	0.40***	0.42***	0.35***	0.24***	0.26***	0.13*
P/C	Q8Eng_l	397	4.56171	1.11208	0.30***	0.53***	0.47***	0.49***	0.47***	0.30***	0.28***	0.03	0.16**	0.17***	0.10*	0.22***	0.40***	0.30***	0.26***	-0.17***	-0.15**	0.33***	-0.18***	-0.32***	0.25***	0.25***	0.08	0.41***	0.12*	-0.07	-0.06	-0.10*	0	-0.03	-0.14**	0.14**	0.20***	0.19***	0.14**	0.20***	0.24***	0.23***	0.41***	0.43***	0.42***	0.36***	0.23***	0.28***	0.11*
P/C	Q8Eng_m	397	4.37028	1.12431	0.29***	0.48***	0.41***	0.44***	0.38***	0.26***	0.21***	0.06	0.16**	0.15**	0.04	0.14**	0.34***	0.22***	0.25***	-0.19***	-0.11*	0.30***	-0.17***	-0.31***	0.22***	0.23***	0.05	0.32***	0.08	-0.09	-0.12*	-0.12*	-0.01	-0.03	-0.11*	0.14**	0.23***	0.20***	0.14**	0.12*	0.16**	0.18***	0.41***	0.40***	0.45***	0.38***	0.27***	0.34***	0.19***
P/C	Q8Eng_n	397	4.53149	1.08579	0.31***	0.48***	0.43***	0.46***	0.40***	0.30***	0.22***	0.05	0.17***	0.15**	0.08	0.17***	0.32***	0.24***	0.20***	-0.18***	-0.17***	0.25***	-0.22***	-0.26***	0.31***	0.24***	0.02	0.36***	0.05	-0.12*	-0.14**	-0.13*	0.01	-0.04	-0.13**	0.15**	0.24***	0.22***	0.16**	0.15**	0.21***	0.23***	0.37***	0.36***	0.41***	0.41***	0.29***	0.35***	0.13**
P/C	Q8Eng_o	397	3.53652	1.50145	0.22***	0.33***	0.30***	0.33***	0.27***	0.20***	0.14**	0.11*	0.15**	0.15**	0.11*	0.17***	0.21***	0.14**	0.18***	-0.11*	-0.06	0.23***	-0.08	-0.17***	0.20***	0.14**	0.01	0.28***	0.10*	-0.07	-0.09	-0.07	0.01	0.01	-0.11*	0.25***	0.29***	0.26***	0.26***	0.14**	0.18***	0.17***	0.34***	0.35***	0.39***	0.32***	0.36***	0.35***	0.17***
Conscientiousness	Q10a	397	2.53401	1.75147	-0.12*	-0.07	-0.11*	-0.03	-0.13*	-0.16**	-0.14**	0.01	0.04	-0.01	-0.07	-0.10*	-0.06	-0.06	-0.08	0.15**	0.22***	-0.18***	0.22***	0.20***	0.06	0.16**	0.09	0.05	-0.08	-0.05	0.09	-0.01	-0.01	0	-0.03	0.30***	0.25***	0.23***	0.10*	0.07	0.09	0.11*	-0.14**	-0.19***	-0.11*	-0.16**	-0.04	-0.11*	-0.07
Agreeableness	Q10b	397	4.31234	1.49009	0.11*	0.10*	0.11*	0.07	0.08	0.18***	0.17***	-0.01	-0.02	0.25***	0.02	0.18***	0.14**	0.11*	0.08	0.03	-0.07	0.20***	-0.04	-0.10*	0.15**	0.19***	0.12*	0.08	0	-0.03	0.06	0	0.01	-0.01	-0.03	0.23***	0.39***	0.21***	0.14**	0.07	0.06	0.10*	0.11*	0.08	0.08	0.07	-0.01	0.06	0.05
Conscientiousness	Q10c	397	2.47607	1.60729	-0.17***	-0.10*	-0.04	0	-0.02	-0.17***	-0.13*	0.02	0.07	-0.04	-0.05	-0.14**	-0.06	-0.08	-0.17***	0.25***	0.25***	-0.23***	0.26***	0.29***	0.18***	0.23***	0.04	0.13*	0.04	-0.05	0.07	-0.07	0.07	0.1	0.01	0.26***	0.25***	0.38***	0.17***	0.16**	0.09	0.11*	-0.16**	-0.21***	-0.18***	-0.18***	-0.14**	-0.13*	-0.02
Agreeableness	Q10f	397	4.60705	1.36024	0.09	0.04	0.1	0.07	0.12*	0.14**	0.18***	-0.05	-0.01	0.27***	0.04	0.25***	0.14**	0.17***	0.11*	-0.06	-0.13*	0.24***	-0.07	-0.16***	0.10*	0.09	0.16**	0.16**	0.06	0.02	0.12*	-0.08	0.03	0.03	0	0.11*	0.13**	0.17***	0.06	0.17***	0.18***	0.20***	0.07	0.07	0.06	0.05	0.06	0.07	0.02
Agreeableness	Q10g	397	4.64232	1.39553	0.07	0.04	0.12*	0.05	0.11*	0.12*	0.16**	0.03	0.12*	0.33***	0.14**	0.48***	0.18***	0.17***	0.11*	-0.01	-0.06	0.17***	0.02	-0.12*	0.14**	0.10*	0.13*	0.20***	0.08	-0.01	0.1	-0.08	-0.04	0.04	0.03	0.10*	0.17***	0.18***	0.1	0.19***	0.23***	0.32***	0.10*	0.12*	0.07	0.04	0.05	0.08	0.12*
Conscientiousness	Q10h	397	1.32242	1.29171	-0.16**	-0.16**	-0.19***	-0.18***	-0.25***	-0.12*	-0.14**	-0.03	-0.02	-0.12*	-0.05	-0.16**	-0.13**	-0.14**	-0.30***	0.23***	0.26***	-0.44***	0.30***	0.42***	0.12*	0.12*	0.15**	0.16***	0.02	-0.07	0.12*	-0.1	0.01	0.03	-0.02	0.09	0.21***	0.15**	0.06	0.10*	0.09	0.12*	-0.18***	-0.20***	-0.20***	-0.18***	-0.10*	-0.17***	-0.03
Agreeableness	Q10i	397	4.11335	1.30838	0.14**	0.10*	0.08	0.12*	0.09	0.15**	0.12*	-0.05	0.11*	0.29***	0.19***	0.37***	0.16**	0.16**	0.17***	-0.06	-0.16**	0.22***	-0.1	-0.13**	0.15**	0.04	0.11*	0.15**	0	-0.01	0.06	-0.05	0	0	-0.03	0.09	0.18***	0.13**	0.07	0.09	0.12*	0.13*	0.09	0.12*	0.11*	0.1	0.04	0.17***	0.12*
Conscientiousness	Q10k	397	1.97985	1.64979	-0.14**	-0.10*	-0.08	-0.04	-0.13**	-0.14**	-0.17***	-0.07	0	0	-0.09	-0.04	-0.14**	-0.07	-0.11*	0.19***	0.20***	-0.20***	0.23***	0.25***	0.18***	0.16**	0.11*	0.21***	0	-0.08	0.05	-0.14**	-0.03	0.03	-0.02	0.12*	0.21***	0.17***	0.13*	0.18***	0.17***	0.19***	-0.10*	-0.13*	-0.08	-0.11*	0.02	-0.04	0.05
Agreeableness	Q10l	397	4.15869	1.49325	0.14**	0.11*	0.13*	0.11*	0.14**	0.17***	0.14**	-0.04	-0.03	0.27***	0.04	0.30***	0.16**	0.22***	0.15**	-0.09	-0.14**	0.22***	-0.11*	-0.19***	0.21***	0.20***	0.12*	0.13**	0.01	-0.06	0.1	-0.04	0.05	0.05	-0.01	0.12*	0.21***	0.19***	0.11*	0.12*	0.07	0.11*	0.13**	0.15**	0.12*	0.10*	0.13**	0.17***	0.09
Conscientiousness	Q10n	397	4.45844	1.31095	0.22***	0.11*	0.13*	0.10*	0.16**	0.22***	0.18***	0.05	0.02	0.15**	0.11*	0.18***	0.05	0.17***	0.21***	-0.11*	-0.13**	0.35***	-0.12*	-0.26***	0.21***	0.18***	0.1	0.26***	0.18***	-0.05	0.01	-0.06	-0.01	-0.09	-0.09	0.20***	0.19***	0.19***	0.19***	0.13*	0.16**	0.17***	0.14**	0.11*	0.11*	0.09	0.07	0.15**	0.09
Engineering Disciplines	Q14a	397	2.36776	1.87777	0.03	0.02	0.08	0.03	0.05	0.01	-0.05	0.02	0.16***	-0.09	0.06	-0.06	0.15**	0.07	0	0.06	0.08	-0.04	0.08	-0.04	0.22***	0.23***	0.05	0.32***	0.08	-0.09	-0.12*	-0.12*	-0.01	-0.03	-0.11*	0.14**	0.23***	0.20***	0.14**	0.12*	0.16**	0.18***	0.10*	0.13**	0.15**	0.13**	0.15**	0.13**	0.04
Engineering Disciplines	Q14b	397	2.33249	1.79373	0.05	-0.08	-0.02	-0.01	-0.03	0.06	0.09	-0.11*	0.03	0.14**	0.06	0.05	0.04	0.05	-0.04	0.08	0.02	-0.04	0.09	0.01	0.31***	0.24***	0.02	0.36***	0.05	-0.12*	-0.14**	-0.13*	0.01	-0.04	-0.13**	0.15**	0.24***	0.22***	0.16**	0.15**	0.21***	0.23***	-0.05	-0.06	-0.06	-0.01	-0.01	-0.03	-0.14**
Engineering Disciplines	Q14c	397	3.5466	2.14522	0.04	0.06	0.01	0.05	0	0.01	0.04	0.03	0.14**	0.17***	0.04	0.07	0.05	0.11*	-0.03	0.03	-0.03	0.03	0.02	0.01	0.20***	0.14**	0.01	0.28***	0.10*	-0.07	-0.09	-0.07	0.01	0.01	-0.11*	0.25***	0.29***	0.26***	0.26***	0.14**	0.18***	0.17***	-0.03	-0.06	-0.05	0.01	-0.03	0.03	-0.07
Engineering Disciplines	Q14d	397	3.02015	2.04114	0.04	0.03	0.08	0.04	0.07	0.01	0.06	-0.07	0.09	0.06	0.11*	0.06	0.08	0.02	-0.01	-0.01	-0.01	0.03	0.03	-0.08	0.23***	0.23***	0.05	0.17***	0.02	-0.01	0.01	0	0.24***	0.15**	-0.01	0.16**	0.15**	0.21***	0.19***	0.19***	0.22***	0.20***	0.01	-0.01	0.02	0.03	0.06	0	0
Engineering Disciplines	Q14e	397	2.55416	1.90168	-0.02	-0.10*	-0.03	-0.08	0.02	0.03	-0.04	0.06	0.05	-0.07	0.13**	0.02	-0.03	-0.13*	0.02	0.17***	0.14**	-0.05	0.15**	0.11*	0.17***	0.22***	0.06	0.13*	0.07	-0.06	-0.07	0.03	0.20***	0.15**	0.03	0.11*	0.13**	0.13**	0.16**	0.08	0.15**	0.14**	0.02	0.02	-0.02	-0.01	0.02	0	0
Engineering Disciplines	Q14f	397	2.1335	1.85723	0.06	0.08	0.07	0.06	0.06	0.03	-0.02	0.08	0.07	-0.12*	0.04	-0.09	0.13*	0.02	0.09	0.12*	0.20***	-0.03	0.1	0.04	0.15**	0.15**	0.05	0.10*	0.04	-0.05	-0.04	0	0.23***	0.20***	0.01	0.13*	0.11*	0.13**	0.16**	0.19***	0.20***	0.18***	0.05	0.08	0.05	0.02	0.01	0	-0.01
Engineering Disciplines	Q14g	397	1.62217	1.59966	-0.04	-0.02	0.04	-0.05	0.03	-0.04	-0.07	0.06	0.08	-0.1	0.14**	0.01	0.02	-0.11*	0.01	0.09	0.12*	-0.09	0.08	0.04	0.09	0.16**	0.03	0.09	0	-0.06	-0.10*	-0.02	0.19***	0.03	-0.04	0.05	0.09	0.08	0.08	0.07	0.12*	0.11*	0.07	0.08	0.02	0.01	0.02	-0.02	-0.01
Engineering Disciplines	Q14h	397	2.32494	1.87156	0.03	0.08	0.07	0.05	0.06	-0.02	-0.05	0.02	0.11*	-0.10*	0.06	-0.05	0.04	0	0.07	0.06	0.08	0	0	-0.07	0.14**	0.12*	0.09	0.05	0.03	0.01	-0.05	0.01	0.20***	0.17***	0.09	0.14**	0.15**	0.16**	0.15**	0.13**	0.16**	0.19***	0.12*	0.14**	0.12*	0.09	0.03	0.05	0.11*
Engineering Disciplines	Q14i	397	2.11587	1.75427	0.05	0.04	0.11*	0.04	0.10*	0.06	-0.01	-0.02	0.09	-0.03	0.09	0.03	0.06	0.03	0.06	0.09	0.04	0.03	0.03	-0.02	0.14**	0.17***	-0.03	0.25***	0.02	-0.01	-0.09	-0.08	0.01	0.07	0.01	0.12*	0.06	0.15**	0.11*	0.21***	0.19***	0.15**	0.34***	0.35***	0.32***	0.30***	0.25***	0.22***	0.08
Engineering Disciplines	Q14j	397	2.88161	1.96397	0.03	-0.14**	0.04	-0.04	0.04	0.11*	0.05	-0.11*	-0.02	0.11*	0.07	0.09	-0.04	0.05	-0.01	0.14**	0.05	-0.04	0.07	0.11*	0.25***	0.26***	-0.02	0.30***	0.05	-0.06	-0.11*	-0.06	0.03	0.08	-0.07	0.12*	0.08	0.16**	0.13**	0.20***	0.18***	0.18***	0.02	0.05	0.01	-0.02	0.01	0.05	-0.08
Engineering Disciplines	Q14k	397	2.60705	1.874	0.07	-0.05	0.07	0.01	0.01	0.11*	0.03	0.15**	0.07	0	0.20***	0.24***	0.05	-0.02	0.03	0.15**	0.14**	0.02	0.12*	0.12*	0.04	-0.01	0.18***	0.09	0.31***	0.05	0.02	0.11*	-0.12*	0.18***	0.08	0.10*	0.12*	0.1	0.09	0.04	0.06	0.07	0.06	0.07	0.05	0.02	0.05	0.05	0.07
Engineering Disciplines	Q14l	397	1.733	1.65884	0.06	-0.03	0	-0.05	-0.02	0.04	0.02	0.10*	0.09	-0.05	0.07	0.02	0.03	-0.04	0.01	0.14**	0.15**	-0.06	0.06	0.07	0.01	-0.06	0.15**	0.10*	0.29***	0.13*	0.09	0.20***	0.04	0.12*	0.23***	0.09	0.14**	0.06	0.06	0.10*	0.04	0.02	0.02	0.04	0.05	0.01	0.01	0.02	-0.05
Engineering Disciplines	Q14m	397	2.71033	1.84068	0	0	0.07	0.01	0.06	0.03	0.03	0.06	0.1	-0.07	0.11*	0.12*	0.11*	0.02	0	0.04	0.08	-0.01	0.06	-0.01	-0.04	-0.06	0.14**	0.13*	0.26***	0.02	0.01	0.04	-0.03	0.16**	0.11*	0.1	0.09	0.12*	0.04	0.02	0.06	0.07	0.02	0.03	0.06	0.04	0.12*	0.04	0.07
Engineering Disciplines	Q14n	397	3.11335	1.97963	0.06	0.08	0.14**	0.07	0.14**	0.06	0.03	0.07	0.08	-0.09	0.13**	0.03	0.18***	0.04	0.04	0.06	0.08	0.02	0.08	-0.02	0.01	0	0.06	0.23***	0.18***	0.03	-0.07	-0.01	-0.25***	-0.02	0.04	0.12*	0.18***	0.13*	0.11*	0.15**	0.18***	0.20***	0.11*	0.12*	0.08	0.09	0.11*	0.05	0.08
Engineering Disciplines	Q14o	397	2.27708	1.71411	0.02	-0.04	0.02	-0.02	0.04	0.02	0	-0.06	0.10*	0.04	0.02	0.06	0.09	0.05	0.08	0.13**	0.1	0	0.12*	0.06	0	-0.07	0.17***	0.07	0.21***	0.05	0.03	0.07	-0.02	0.23***	0.22***	0.12*	0.16**	0.16**	0.13*	0.12*	0.13**	0.11*	0.12*	0.14**	0.13*	0.10*	0.14**	0.06	-0.01
Engineering Disciplines	Q14p	397	2.30227	1.8841	0.08	0	0.10*	0.05	0.07	0	-0.01	0	0.15**	0.01	0.10*	0.02	0.12*	0.09	0.04	0.04	-0.01	0.02	0.01	-0.07	0.04	-0.02	0.15**	0.12*	0.17***	0.04	0.04	0.09	-0.01	0.06	0.13*	0.14**	0.18***	0.19***	0.15**	0.14**	0.17***	0.18***	0.10*	0.11*	0.12*	0.11*	0.11*	0.09	0.03
Engineering Disciplines	Q14q	397	2.44836	1.87231	-0.02	-0.08	-0.03	-0.06	-0.03	0	-0.02	0.07	0.14**	0.1	0.03	-0.01	-0.01	0.02	0.02	0.13**	0.11*	-0.04	0.15**	0.15**	0	-0.03	0.13**	-0.07	0.05	0.16**	0.19***	0.05	0.12*	0.14**	0.12*	0.07	0.10*	0.12*	0.03	0.03	0.03	0.05	0.02	-0.03	0.03	0.02	0.02	0.04	0.14**
Engineering Disciplines	Q14r	397	1.71788	1.70294	0.01	-0.18***	-0.16**	-0.21***	-0.15**	-0.05	-0.03	0.04	0.07	-0.02	0.05	-0.06	-0.06	-0.01	-0.04	0.17***	0.13**	-0.03	0.17***	0.12*	-0.04	-0.04	0.18***	-0.07	0.12*	0.12*	0.23***	0.18***	0.04	0.16**	0.32***	-0.03	0.03	-0.01	-0.08	-0.01	-0.07	-0.05	-0.09	-0.13**	-0.11*	-0.13**	-0.11*	-0.09	0.04
[truncated: 52 more columns]
